# Supplementary material for: New covalent bonded polymer–calcium silicate hydrate composites
Source: Royal Society of Chemistry journal article supplement (doi:10.1039/b613077a), 2006-12-15
Supplement: b613077a.pdf [file b613077a.pdf]

## **New covalent bonded polymer-calcium silicate hydrate composites**

*Alexandre Franceschini, Sébastien Abramson, Valerio Mancini, Bruno Bresson, Christophe  
Chassenieux and Nicolas Lequeux*

Supplementary material (ESI) for Journal of Materials Chemistry :  
 $^1\text{H}$  and  $^{13}\text{C}$  NMR spectra of the polymers ; Determination of the polymer content  
in the composites from thermogravimetric analysis.

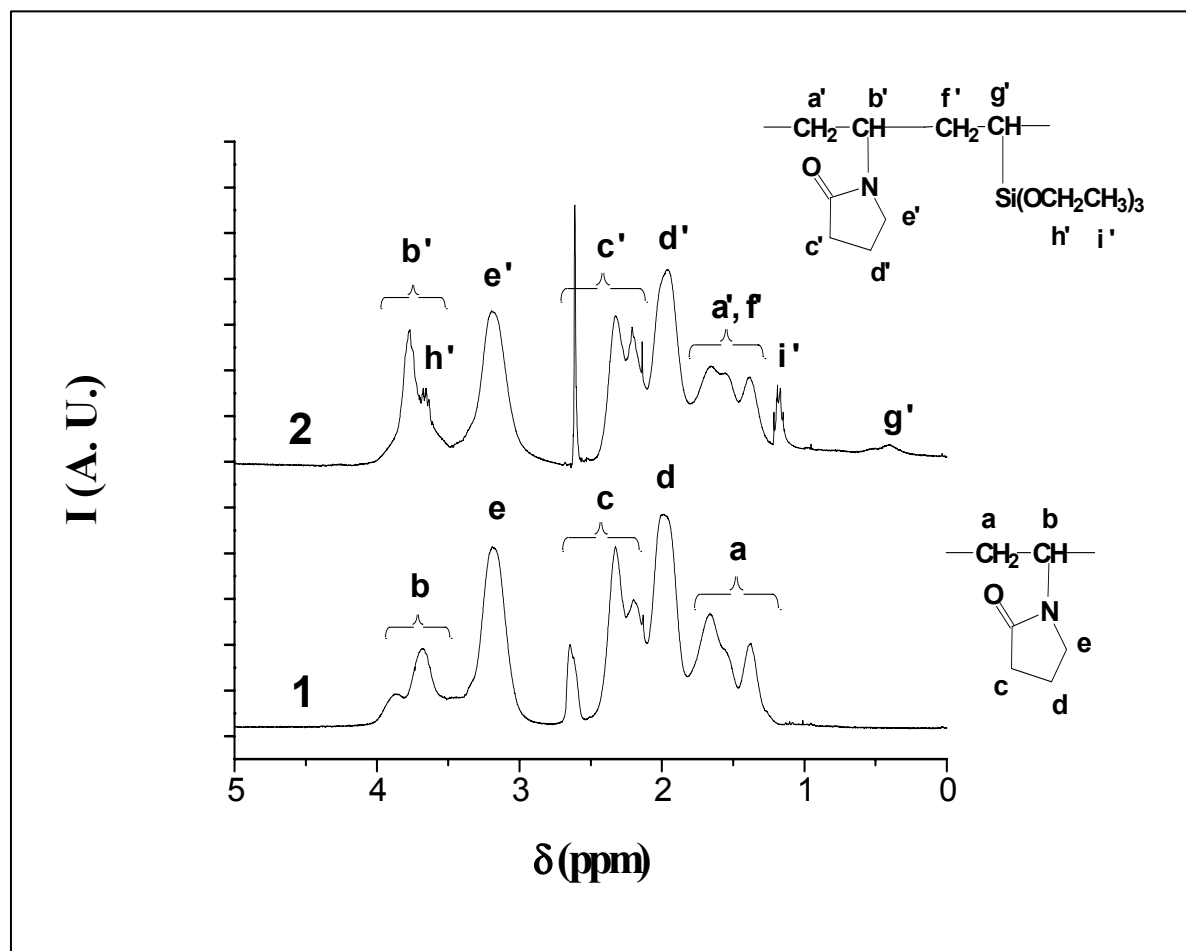

**Figure S1 :** <sup>1</sup>H NMR spectra of polymers : 1 = PVP-T0 ; 2 = PVP-T9

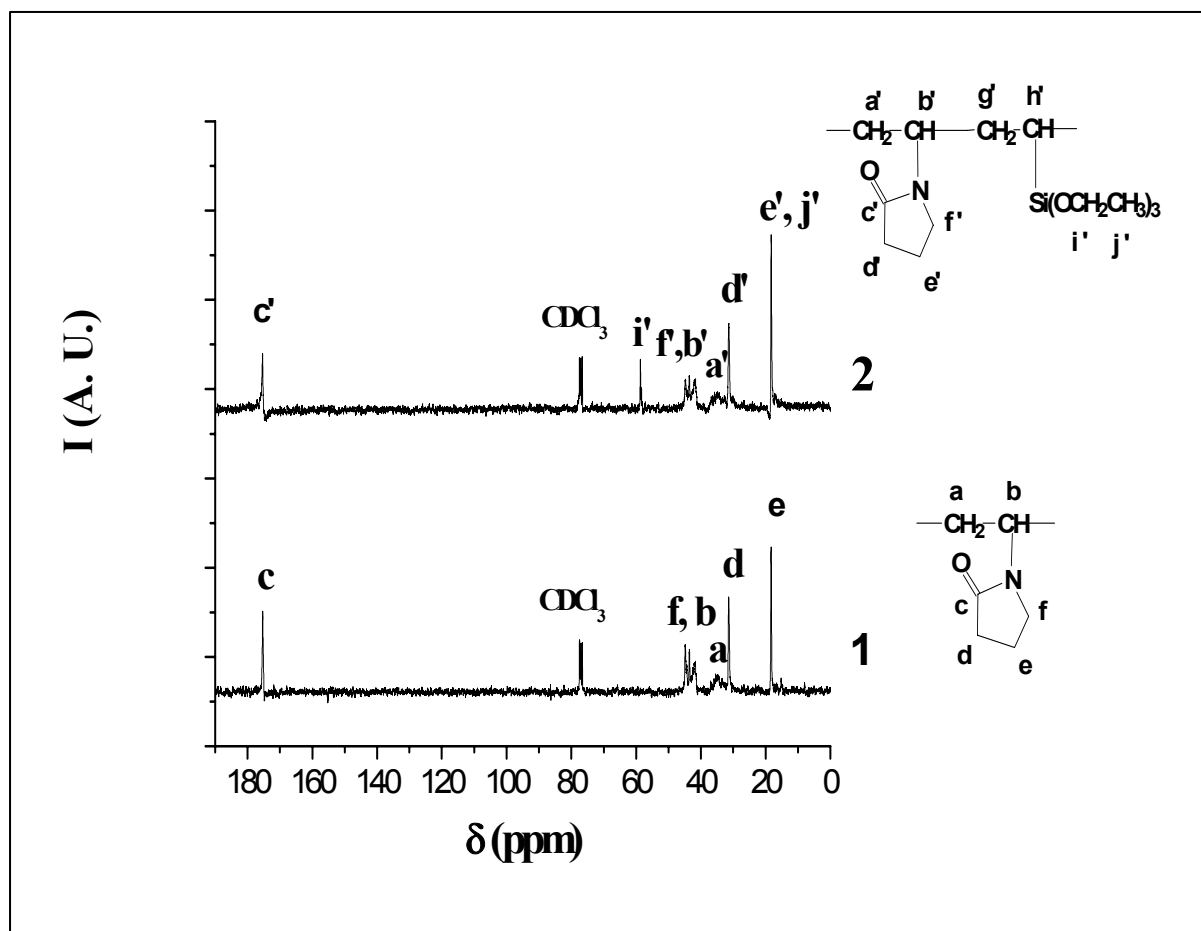

Figure S2 :  $^{13}\text{C}$  NMR spectra of polymers : 1= PVP-T0 ; 2= PVP-T9

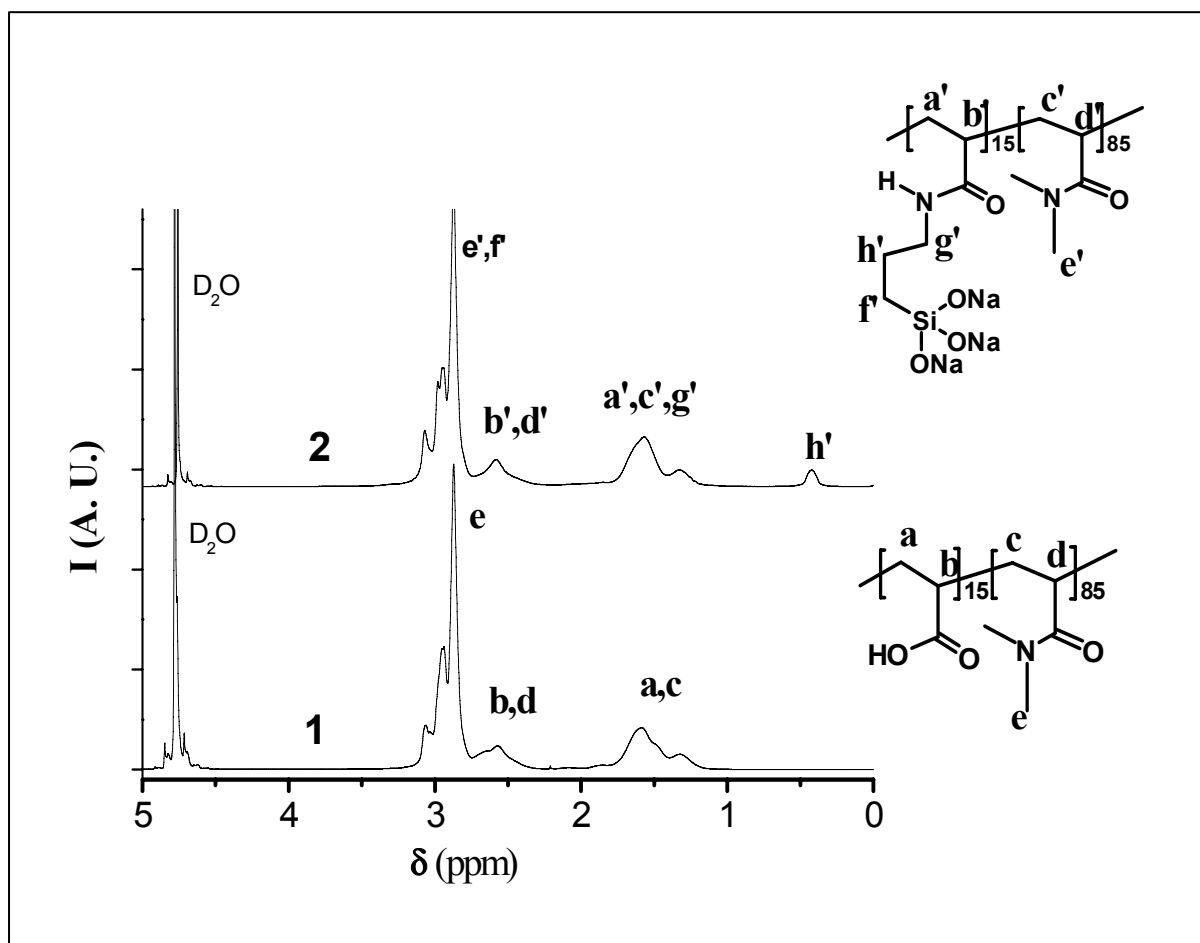

**Figure S3:**  $^1\text{H}$  NMR spectra of polymers : 1=PDMA-AA ; 2= PDMA-T15-D0

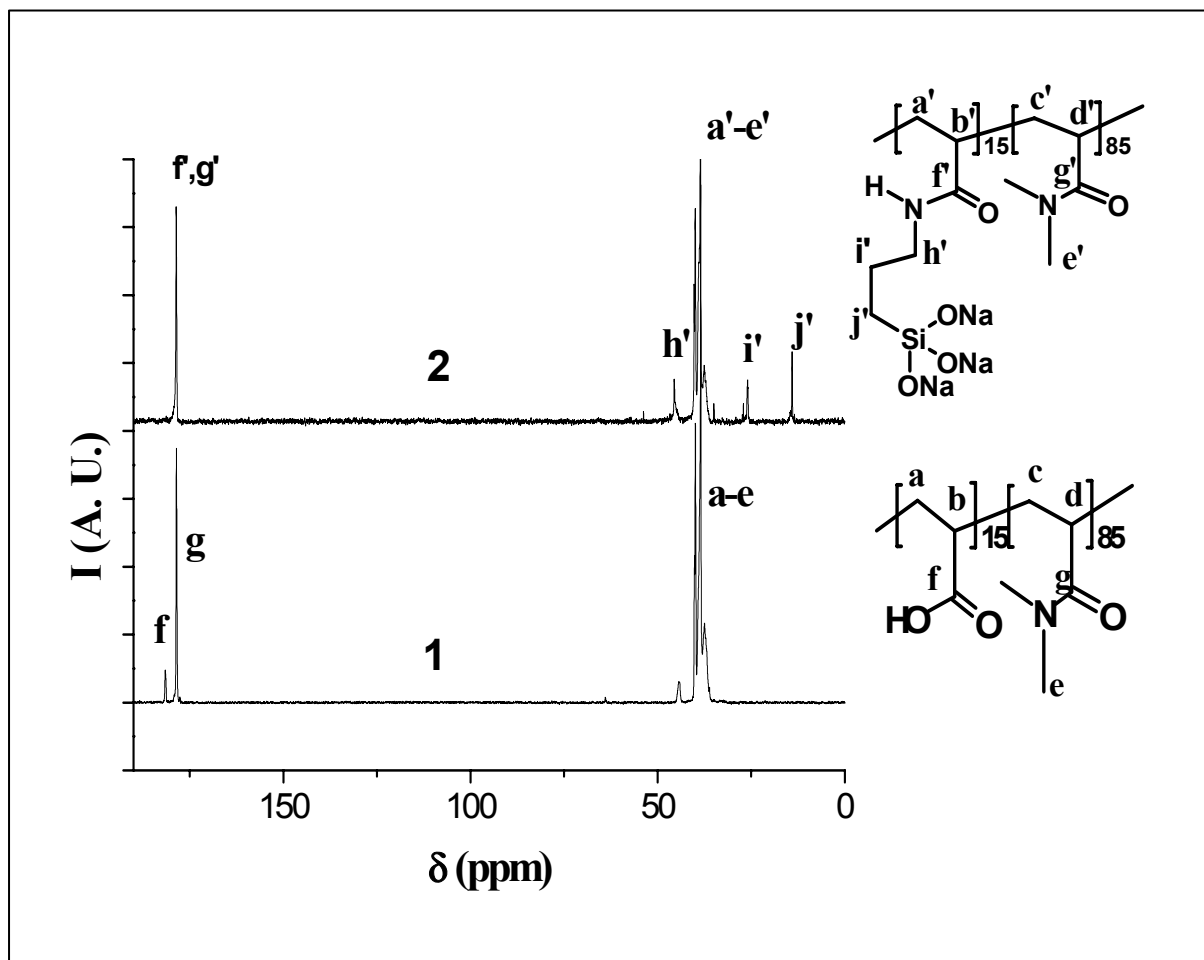

**Figure S4:**  $^{13}\text{C}$  NMR spectra of polymers : 1=PDMA-AA ; 2=PDMA-T15-D0

**Determination of the polymer content in the composites from thermogravimetric analysis.**

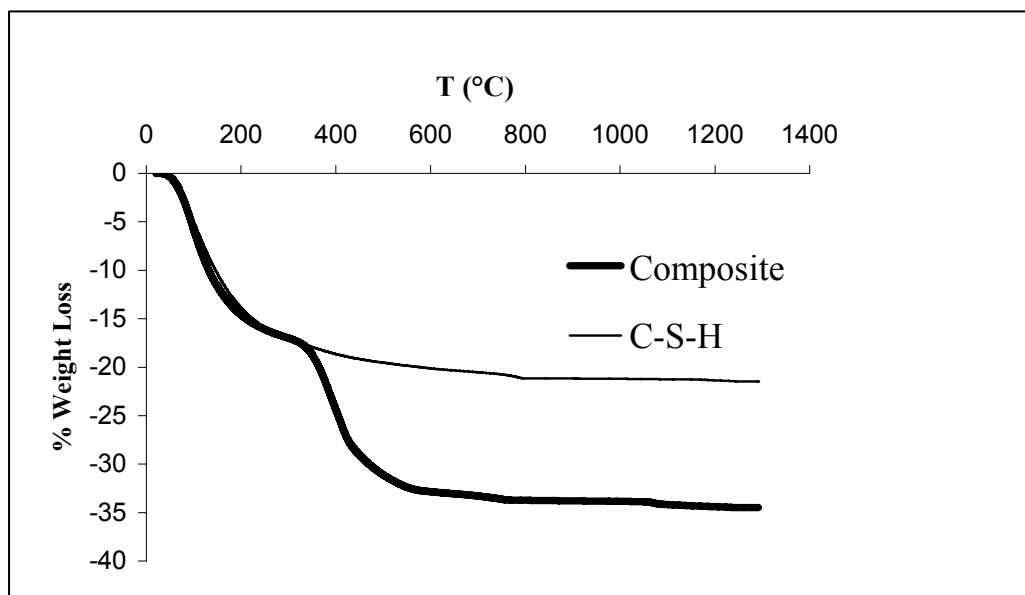

**Figure S5 :** typical thermogram of a pure C-S-H sample and of a composite sample

The exothermic weight loss between 300 and 640°C ( $\%(300-640^{\circ}\text{C})$ ) in the composite is attributed to the polymer combustion and to desorption of small amount of water. In pure inorganic C-S-H, the weight loss between 300 and 640°C ( $\%(300-640^{\circ}\text{C in C-S-H})$ ) (about 5%) is only attributed to desorption of small amount of water. Therefore, the percentage of organic is given by the difference  $\%(300-640^{\circ}\text{C}) - \%(300-640^{\circ}\text{C in C-S-H})$ .

For all materials, the weight loss under 250°C (generally 10-15%) and above 640°C (less than 1%) are respectively attributed to desorption of physisorbed water and decarbonation of  $\text{CaCO}_3$ . Above 850°C, no additional weight loss is observed and there only remains anhydrous calcium silicate. The percentage of anhydrous calcium silicate is given by the relation  $100 - \%(25-850^{\circ}\text{C})$ , where  $\%(25-850^{\circ}\text{C})$  represents the total weight loss. The polymer

content in the composite with respect to anhydrous calcium silicate ( $m_p/(m_{Si}+m_{Ca})$ ) is therefore obtained by the following equation :

$$m_p/(m_{Si}+m_{Ca}) = \left[ \left( \% (300-640^\circ\text{C}) - \% (300-640^\circ\text{C in C-S-H}) \right) \times 100 \right] / \left[ 100 - \% (25-850^\circ\text{C}) \right]$$
